# Supplementary material
Source: PubMed Central journal article supplement (PMC3225065)
Supplement: NIHMS321575-supplement-1_si_001.pdf [file NIHMS321575-supplement-1_si_001.pdf]

# SUPPORTING INFORMATION

## Influence of Scaffold Size on Bactericidal Activity of Nitric Oxide-Releasing Silica Nanoparticles

*Alexis W. Carpenter, Danielle L. Slomberg, Kavitha S. Rao, and Mark H. Schoenfisch\**

Department of Chemistry, University of North Carolina at Chapel Hill, Chapel Hill, North Carolina

27599

\*Email: [schoenfisch@unc.edu](mailto:schoenfisch@unc.edu)

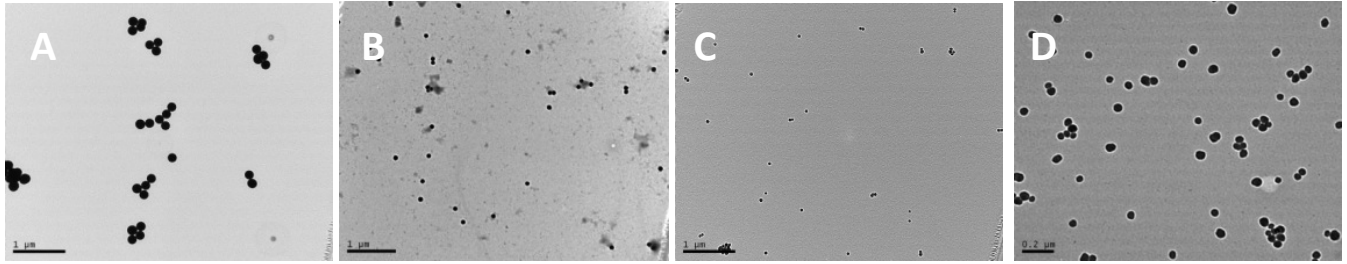

**Figure S1.** TEM micrographs of (A) 200, (B) 100, and (C,D) 50 nm AHAP/TEOS silica nanoparticles. Scale bar is 1  $\mu\text{m}$  for A–C and 0.2  $\mu\text{m}$  for D.

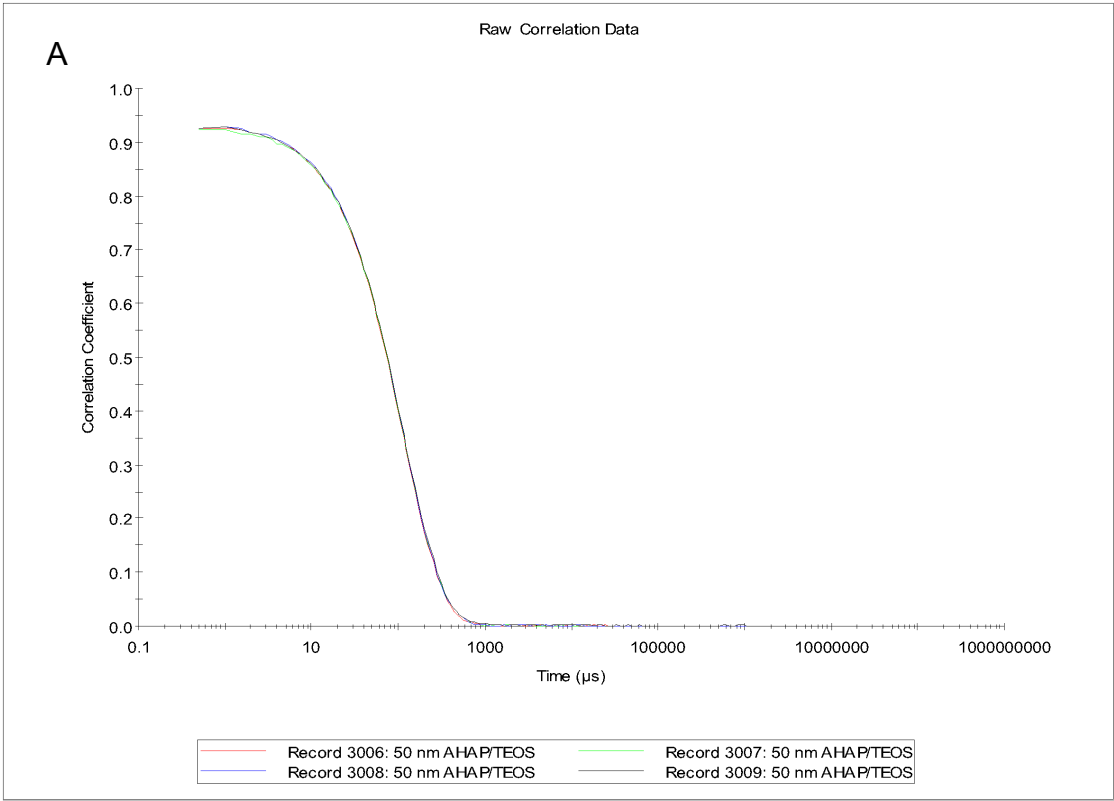

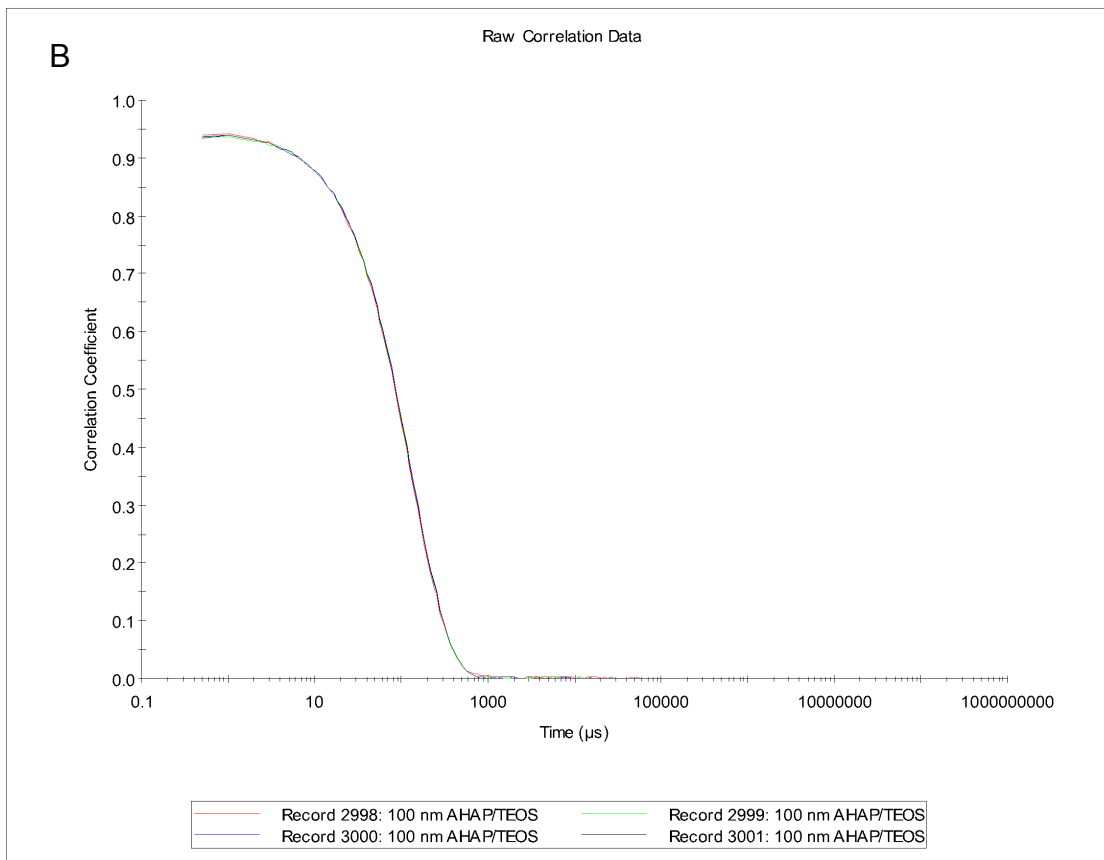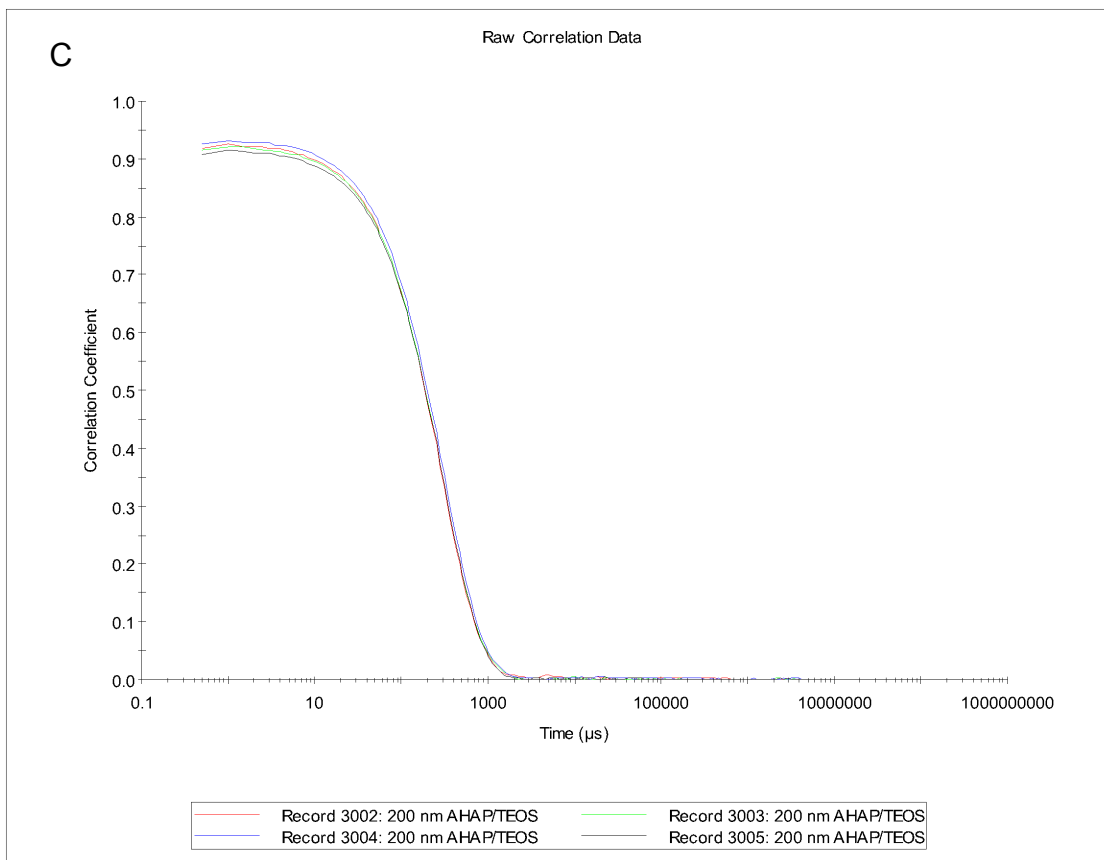

**Figure S2.** Dynamic light scattering (DLS) correlation function plots obtained for (A) 50, (B) 100, and (C) 200 nm particles.

**Table S1.** Concentration of NO corresponding to the particle concentrations tested in cytotoxicity assays.

| Particle Size (nm) | Particle Dose (mg mL <sup>-1</sup> ) | Total NO Dose |      |
|--------------------|--------------------------------------|---------------|------|
|                    |                                      | 2 h           | 24 h |
|                    |                                      | (μmol)        |      |
| 50                 | 0.1                                  | 0.05          | 0.15 |
|                    | 0.2                                  | 0.09          | 0.30 |
|                    | 0.4                                  | 0.19          | 0.60 |
|                    | 0.8                                  | 0.37          | 1.19 |
|                    | 1.6                                  | 0.75          | 2.38 |
|                    | 3.2                                  | 1.49          | 4.77 |
| 100                | 0.1                                  | 0.04          | 0.13 |
|                    | 0.2                                  | 0.08          | 0.25 |
|                    | 0.4                                  | 0.15          | 0.50 |
|                    | 0.8                                  | 0.30          | 1.01 |
|                    | 1.6                                  | 0.61          | 2.02 |
|                    | 3.2                                  | 1.22          | 4.03 |
| 200                | 0.1                                  | 0.04          | 0.10 |
|                    | 0.2                                  | 0.08          | 0.20 |
|                    | 0.4                                  | 0.17          | 0.40 |
|                    | 0.8                                  | 0.34          | 0.81 |
|                    | 1.6                                  | 0.68          | 1.62 |
|                    | 3.2                                  | 1.35          | 3.23 |

**Table S2.** Bacteria cell viability of blank (i.e., in PBS only) nor control (i.e., non-NO-releasing control AHAP/TEOS particles). Initial bacteria concentration is 10<sup>6</sup> CFU/mL.

|             | Dose mg/mL | Exposure Time h | Bacterial Viability CFU/mL  |
|-------------|------------|-----------------|-----------------------------|
| Blank (PBS) | 0          | 2               | 6.3(±0.5)x10 <sup>6</sup>   |
|             | 0          | 24              | 8.6(±0.2)x10 <sup>6</sup>   |
| 50 nm       | 0.8        | 2               | 1.2(±0.2)x10 <sup>6</sup>   |
|             | 0.2        | 24              | 9.6(±2.3)x10 <sup>6</sup>   |
| 100 nm      | 1.5        | 2               | 3.5(±0.4)x10 <sup>6</sup>   |
|             | 0.2        | 24              | 2.7(±0.2)x10 <sup>6</sup>   |
| 200 nm      | 1.5        | 2               | 1.27(±0.03)x10 <sup>6</sup> |
|             | 0.4        | 24              | 5.2(±1.5)x10 <sup>6</sup>   |

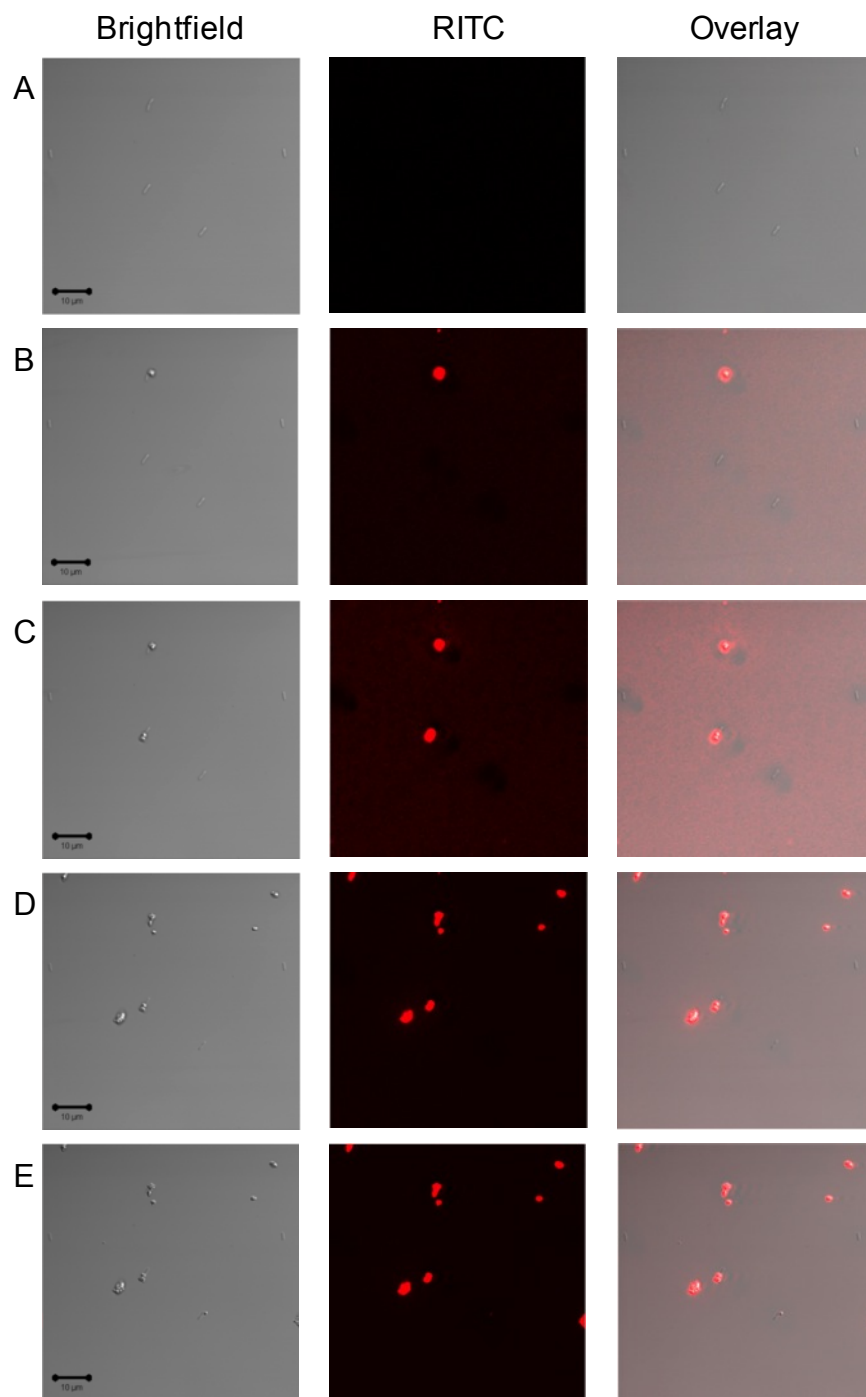

**Figure S2.** Scanning confocal images of *P. aeruginosa* treated with 50 nm RITC-modified NO-releasing AHAP/TEOS nanoparticles. Brightfield, fluorescence (RITC), and overlay images were acquired (A) 0 (addition of particles), (B) 2.4, (C) 6.4, (D) 19.5, and (E) 39 min after addition of  $10 \mu\text{g mL}^{-1}$  nanoparticles. Scale bars are  $10 \mu\text{m}$ .

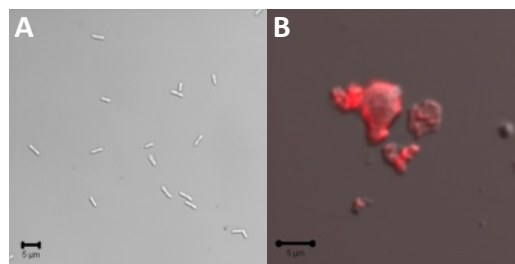

**Figure S3.** Scanning confocal images of *P. aeruginosa* treated with 50 nm RITC-modified NO-releasing AHAP/TEOS nanoparticles. Brightfield image (A) was acquired before addition of  $10 \mu\text{g mL}^{-1}$  nanoparticles and fluorescence overlay image (B) was acquired after 10 min incubation with nanoparticles. Scale bars are  $5 \mu\text{m}$ .
